# Supplementary material for: BNC1 deficiency-triggered ferroptosis through the NF2-YAP pathway induces primary ovarian insufficiency
Source: PubMed Central journal article supplement (PMC9534854; doi:10.1038/s41467-022-33323-8), 2022-10-05

## **Supplementary Information:**

### **BNC1 deficiency-triggered ferroptosis through the NF2-YAP**

#### **pathway induces primary ovarian insufficiency**

Feixia Wang<sup>1, #</sup>, Yifeng Liu<sup>1, #</sup>, Feida Ni<sup>1, #</sup>, Jiani Jin<sup>1</sup>, Yiqing Wu<sup>1</sup>, Yun Huang<sup>1</sup>, Xiaohang Ye<sup>1</sup>, Xilin Shen<sup>2</sup>, Yue Ying<sup>1</sup>, Jianhua Chen<sup>3</sup>, Ruixue Chen<sup>1</sup>, Yanye Zhang<sup>1</sup>, Xiao Sun<sup>1</sup>, Siwen Wang<sup>1,4</sup>, Xiao Xu<sup>1</sup>, Chuan Chen<sup>1</sup>, Jiansheng Guo<sup>5</sup>, Dan Zhang<sup>1,6\*</sup>

<sup>1</sup>Key Laboratory of Reproductive Genetics (Ministry of Education) and Department of Reproductive Endocrinology, Women's Hospital, Zhejiang University School of Medicine, Zhejiang, 310006, China.

<sup>2</sup>College of Computer Science and Technology, Zhejiang University, Zhejiang, 310027, PR China.

<sup>3</sup>Department of Pathology, Women's Hospital, Zhejiang University School of Medicine, Zhejiang, 310006, People's Republic of China.

<sup>4</sup>Department of Nutrition, Harvard T.H. Chan School of Public Health, Boston, MA, USA, 02215

<sup>5</sup>Center of Cryo-Electron Microscopy, Zhejiang University, Hangzhou, Zhejiang, China.

<sup>6</sup>Clinical Research Center on Birth Defect Prevention and Intervention of Zhejiang Province, Hangzhou, 310006, China.

<sup>#</sup>These authors contributed equally: Feixia Wang, Yifeng Liu, Feida Ni.

\*email: zhangdan@zju.edu.cn

## Supplementary figures

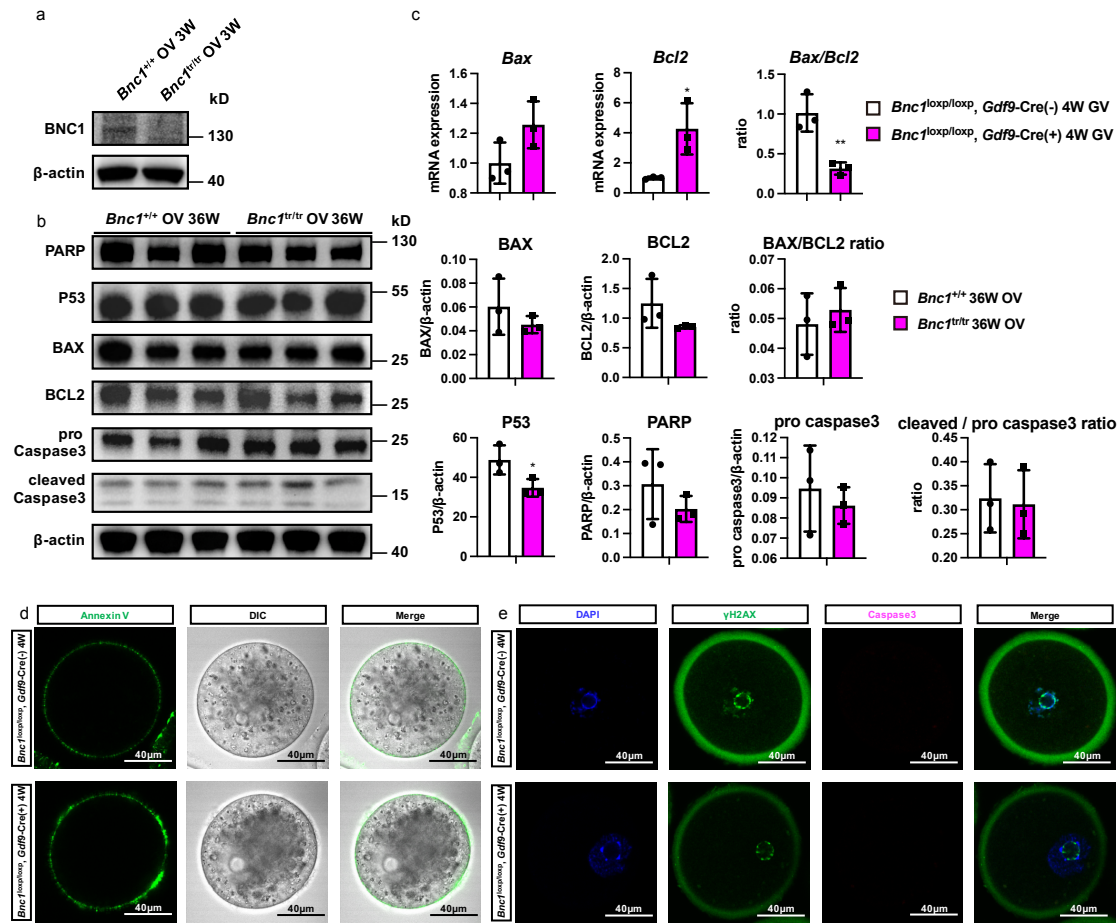

**Supplementary Figure 1. Oocyte-specific *Bnc1* knockout induces follicular atresia through nonapoptotic cell death.**

**a** Ovaries from *Bnc1*<sup>+/+</sup> and *Bnc1*<sup>tr/tr</sup> mice at 3 weeks old were subjected to WB analysis. The expression levels of BNC1 and β-Actin are shown (3 independently experiments). **b** Ovaries from 36-week-old *Bnc1*<sup>+/+</sup> (n=3) and *Bnc1*<sup>tr/tr</sup> (n=3) mice were subjected to WB analysis. The expression levels of P53, PARP, Caspase3, cleaved- Caspase3, BAX and BCL2 are shown (the error bars indicate the mean values ± SDs, unpaired t test, two-tailed, p value=0.0470 for P53, p value=0.3133 for PARP, p value=0.5635 for Caspase3, p value=0.8399 for cleaved-Caspase3, p value=0.3482 for BAX, p value=0.1716 for BCL2 and p value=0.5513 for BAX/BCL2). **c** GV oocytes from *Bnc1*<sup>loxP/loxP</sup>, *Gdf9-Cre*(-) (n=3) and *Bnc1*<sup>loxP/loxP</sup>, *Gdf9-Cre*(+) (n=3) mice at 4 weeks old were used for RT-PCR. The mRNA expression of *Bax* and *Bcl2* is shown (the error bars indicate the mean values ± SDs, unpaired t test, two-tailed, p value=0.1003 for *Bax*, p value=0.0296 for *Bcl2* and p value=0.0081 for *Bax/Bcl2*). **d** GV oocytes obtained from *Bnc1*<sup>loxP/loxP</sup>, *Gdf9-Cre*(-) and *Bnc1*<sup>loxP/loxP</sup>, *Gdf9-Cre*(+) mice at 4 weeks old were used for detection of early apoptosis (3 independent experiments with total oocyte numbers > 30 oocytes). **e** GV oocytes obtained from *Bnc1*<sup>loxP/loxP</sup>, *Gdf9-Cre*(-) and *Bnc1*<sup>loxP/loxP</sup>, *Gdf9-Cre*(+) mice at 4 weeks old were used for detection of Caspase3 (CAS3) and the DNA damage marker γ-H2AX (3 independent experiments with total oocyte numbers > 30 oocytes), \*p value < 0.05, \*\*p value < 0.01 and \*\*\*p value < 0.001. Source data are provided as a Source Data file.

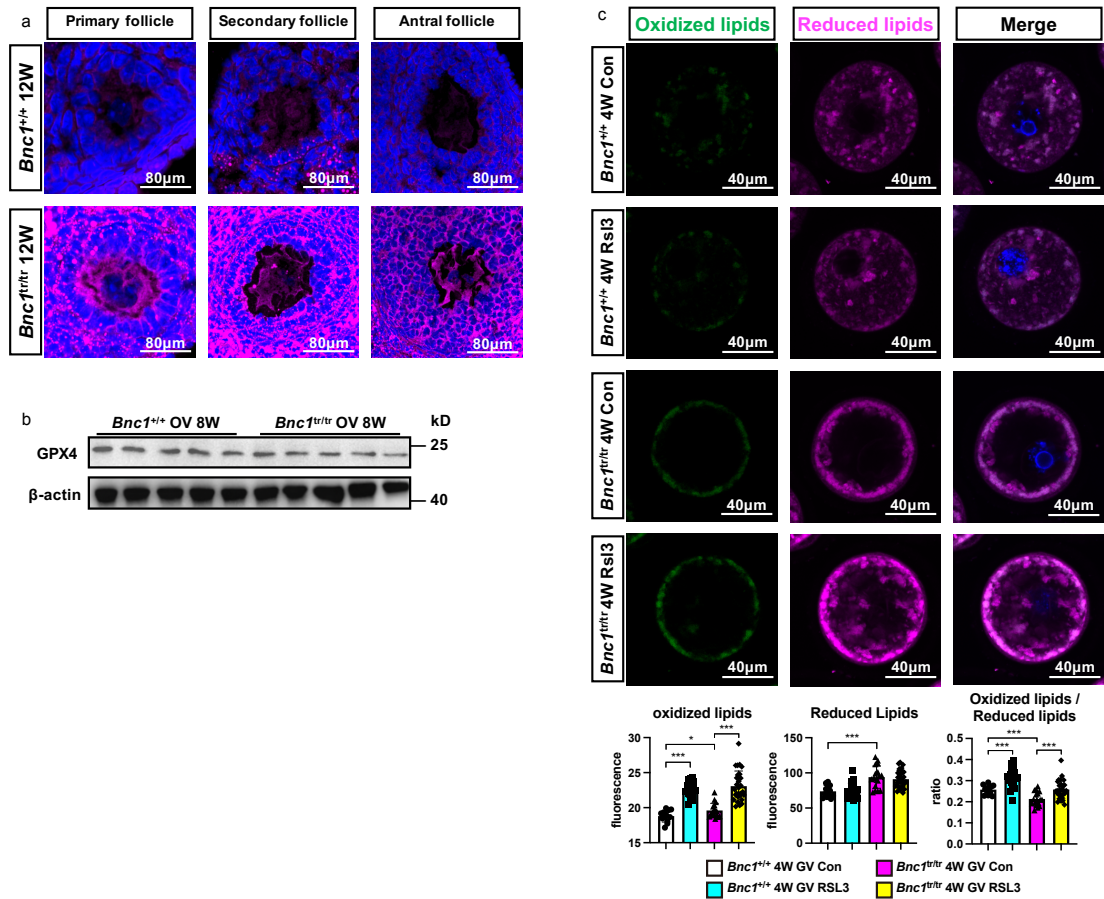

**Supplementary Figure 2. Oocytes affected by *Bnc1* mutation are more sensitive to ferroptosis.**

**a** Nile red of *Bnc1*<sup>+/+</sup> (n=3) and *Bnc1*<sup>tr/tr</sup> (n=3) mouse ovaries. **b** WB of GPX4 in mouse ovaries of *Bnc1*<sup>+/+</sup> (n=5) and *Bnc1*<sup>tr/tr</sup> (n=5) mouse ovaries. **c** Lipid ROS of GV oocytes after RSL3 treatment (for oxidized lipids p value<0.0001 for *Bnc1*<sup>+/+</sup> RSL3, p value=0.0315 for *Bnc1*<sup>tr/tr</sup> Con, p value<0.0001 for *Bnc1*<sup>tr/tr</sup> RSL3, for reduced lipids p value=0.8256 for *Bnc1*<sup>+/+</sup> RSL3, p value=0.0004 for *Bnc1*<sup>tr/tr</sup> Con, p value=0.4840 *Bnc1*<sup>tr/tr</sup> RSL3, for oxidized/reduced lipids p value=0.0013 for *Bnc1*<sup>+/+</sup> RSL3, p value=0.0004 for *Bnc1*<sup>tr/tr</sup> Con and p value=0.0009 for *Bnc1*<sup>tr/tr</sup> RSL3). The error bars indicate the mean values ± SDs, unpaired t test, two-tailed, 3 independent experiments with total oocyte numbers > 30 oocytes, \*p value < 0.05, \*\*p value < 0.01 and \*\*\*p value < 0.001. Source data are provided as a Source Data file.

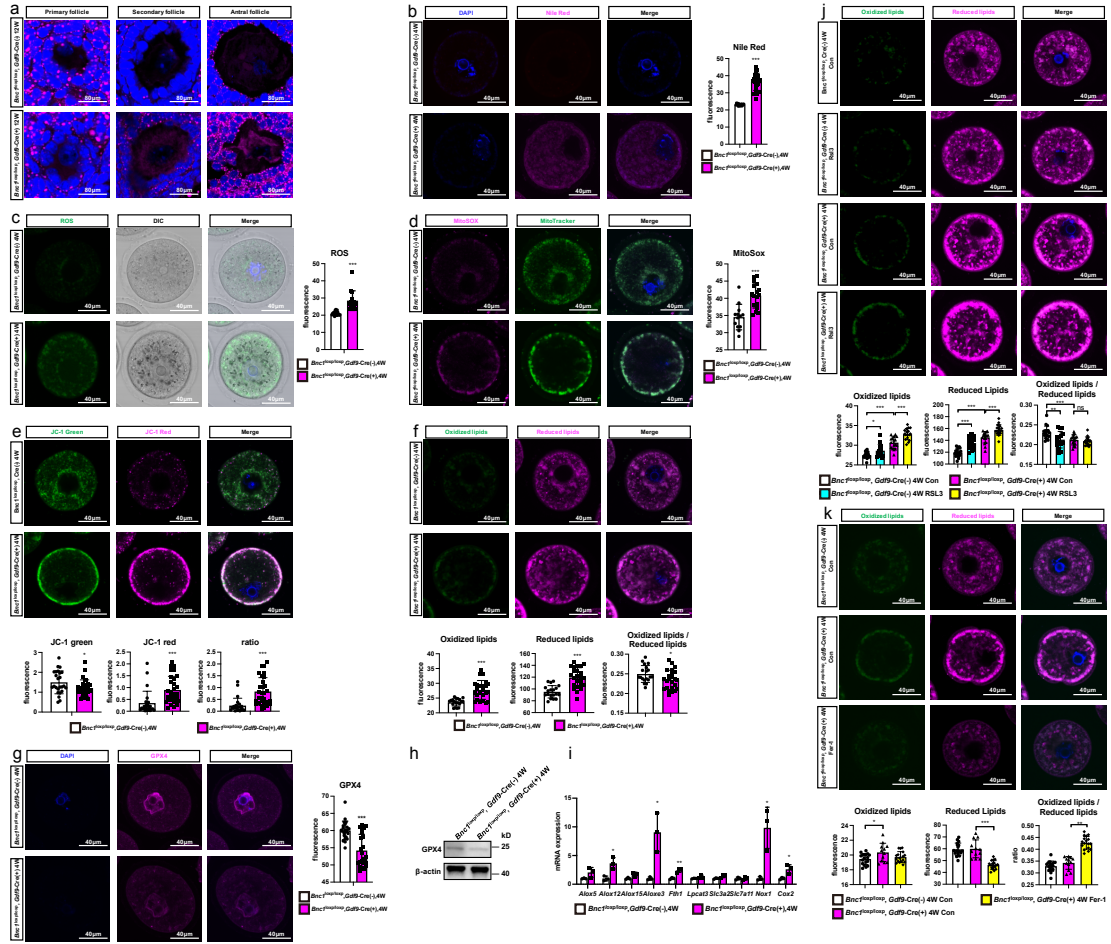

**Supplementary Figure 3. Oocyte-specific *Bcl1*-knockout oocytes are more sensitive to ferroptosis.**

**a** Nile red of *Bcl1*<sup>loxP/loxP</sup>, *Gdf9*-Cre (-) and *Bcl1*<sup>loxP/loxP</sup>, *Gdf9*-Cre (+) mouse ovaries (n=3). **b** Nile red of GV oocytes (p value<0.0001). **c** ROS of GV oocytes (p value<0.0001). **d** MitoSOX and MitoTracker in GV oocytes (p value<0.0001). **e** JC-1 of GV oocytes (p value=0.0374 for JC-1 green, p value=0.0004 for JC-1 red and p value<0.0001 for JC-1 red/green). **f** Lipid ROS of GV oocytes (p value<0.0001 for oxidized lipids, p value<0.0001 for reduced lipids and p value=0.0413 for oxidized/reduced lipids). **g** GPX4 in GV oocytes (p value<0.0001). **h** WB of GPX4 in GV oocytes (3 independently experiments). **i** RT-PCR of ferroptosis-associated markers in GV oocytes (n=3) (p value=0.0226 for *Alox5*, p value=0.0132 for *Alox12*, p value=0.0578 for *Aloxe15*, p value=0.0144 for *Aloxe3*, p value=0.0028 for *Fth1*, p value=0.2300 for *Lpcat3*, p value=0.0691 for *Slc3a2* and p value=0.9711 for *Slc7a11*, p value=0.0267 for *Cox2* and p value=0.0133 for *Nox1*). **j** Lipids ROS in GV oocytes after RSL3 treatment (for oxidized lipids p value=0.0159 for *Bcl1*<sup>loxP/loxP</sup>, *Gdf9*-Cre (-) RSL3, p value<0.0001 for *Bcl1*<sup>loxP/loxP</sup>, *Gdf9*-Cre (+) Con, p value=0.0001 for *Bcl1*<sup>loxP/loxP</sup>, *Gdf9*-Cre (+) RSL3, for reduced lipids p value<0.0001 for *Bcl1*<sup>loxP/loxP</sup>, *Gdf9*-Cre (-) RSL3, p value<0.0001 for *Bcl1*<sup>loxP/loxP</sup>, *Gdf9*-Cre (+) Con, p value=0.0005 for *Bcl1*<sup>loxP/loxP</sup>, *Gdf9*-Cre (+) RSL3, for oxidized/reduced lipids p value=0.0072 for *Bcl1*<sup>loxP/loxP</sup>, *Gdf9*-Cre (-) RSL3, p value=0.0005 for *Bcl1*<sup>loxP/loxP</sup>, *Gdf9*-Cre (+) Con and p value=0.4531 for *Bcl1*<sup>loxP/loxP</sup>, *Gdf9*-Cre (+) RSL3). **k** Lipid ROS in GV oocytes after Fer-1 treatment (for oxidized lipids p value=0.0207 for *Bcl1*<sup>loxP/loxP</sup>, *Gdf9*-Cre (+) Con, p value=0.0989 for *Bcl1*<sup>loxP/loxP</sup>, *Gdf9*-Cre (+) Fer-1, for reduced lipids p value=0.8595 for *Bcl1*<sup>loxP/loxP</sup>, *Gdf9*-Cre (+) Con, p value<0.0001 for *Bcl1*<sup>loxP/loxP</sup>, *Gdf9*-Cre (+) Fer-1, for oxidized/reduced lipids p value=0.1353 for *Bcl1*<sup>loxP/loxP</sup>, *Gdf9*-Cre (+) Con and p value<0.0001 for *Bcl1*<sup>loxP/loxP</sup>, *Gdf9*-Cre (+) Fer-1). The error bars indicate the mean values ± SDs, unpaired t test, two-tailed, 3 independent experiments with total oocyte numbers > 30 oocytes, \*p value < 0.05, \*\*p value < 0.01 and \*\*\*p value < 0.001. Source data are provided as a Source Data file.



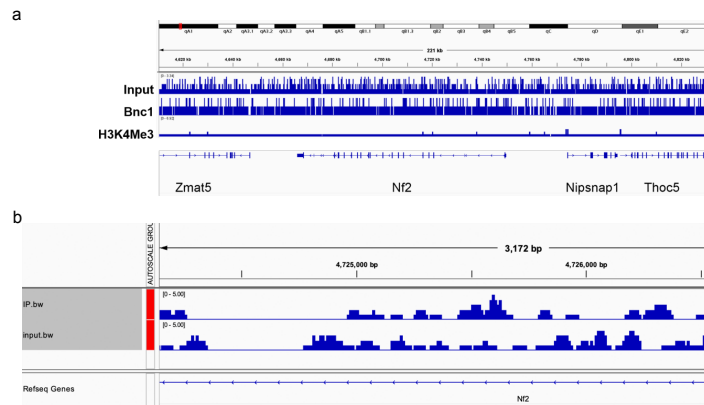

**Supplementary Figure 4. ChIP-seq of mouse ovary.**

**a-b** ChIP-seq for BNC1 of mouse ovary and showing the peaks of BNC1 on *Nf2* (n=3).

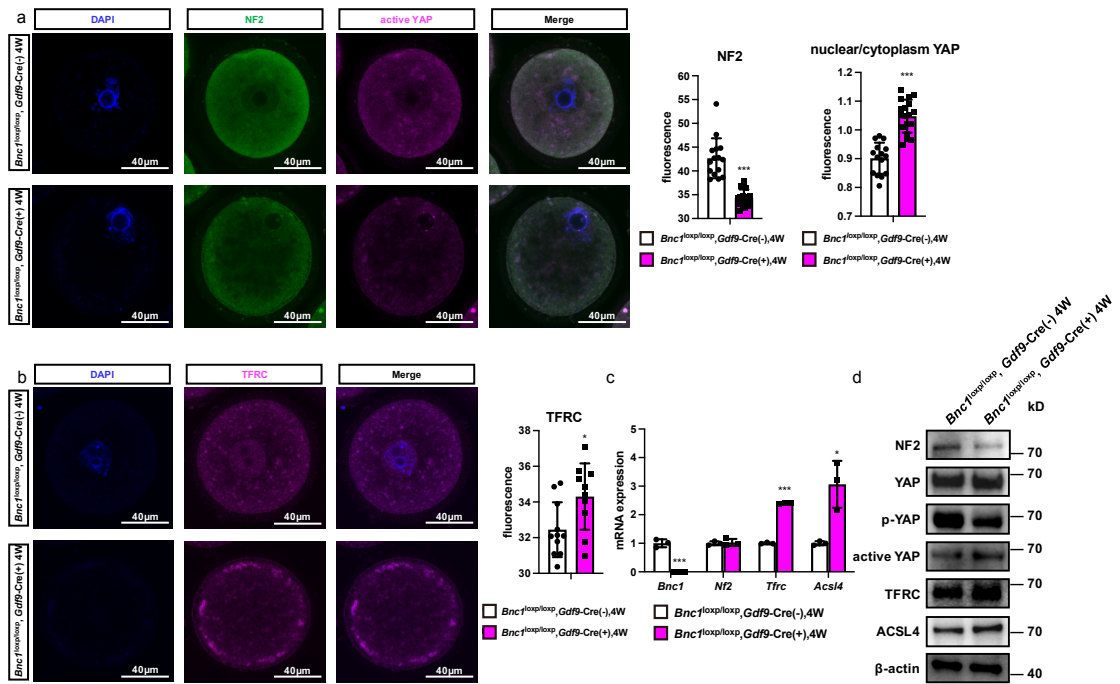

**Supplementary Figure 5. Oocyte-specific *Bnc1* knockout sensitizes oocytes to ferroptosis by regulating NF2-YAP signaling.**

**a** NF2 and active YAP of *Bnc1<sup>loxP/loxP</sup>, Gdf9-Cre (-)* and *Bnc1<sup>loxP/loxP</sup>, Gdf9-Cre (+)* mouse GV oocytes at 4 weeks old (the error bars indicate the mean values  $\pm$  SDs, unpaired t test, two-tailed, p value<0.0001 for NF2, p value<0.0001 for nuclear/cytoplasmic YAP, 3 independent experiments with total oocyte numbers > 30 oocytes). **b** TFRC staining of *Bnc1<sup>loxP/loxP</sup>, Gdf9-Cre (-)* and *Bnc1<sup>loxP/loxP</sup>, Gdf9-Cre (+)* mouse GV oocytes at 4 weeks old (the error bars indicate the mean values  $\pm$  SDs, unpaired t test, two-tailed, p value=0.0213, 3 independent experiments with total oocyte numbers > 30 oocytes). **c** RT-PCR analysis of *Bnc1*, *Nf2*, *Tfrc* and *Acsl4* in *Bnc1<sup>loxP/loxP</sup>, Gdf9-Cre (-)* (n=3) and *Bnc1<sup>loxP/loxP</sup>, Gdf9-Cre (+)* (n=3) mouse GV oocytes at 4 weeks old (p value=0.0009 for *Bnc1*, p value=0.9150 for *Nf2*, p value<0.0001 for *Tfrc* and p value<0.0001 for *Acsl4*, the error bars indicate the mean values  $\pm$  SDs, unpaired t test, two-tailed). **d** WB analysis of NF2, p-YAP, active YAP, YAP, ACSL4, TFRC and  $\beta$ -actin in GV oocytes at 4 weeks old (3 independently experiments). \*p value < 0.05, \*\*p value < 0.01 and \*\*\*p value < 0.001. Source data are provided as a Source Data file.

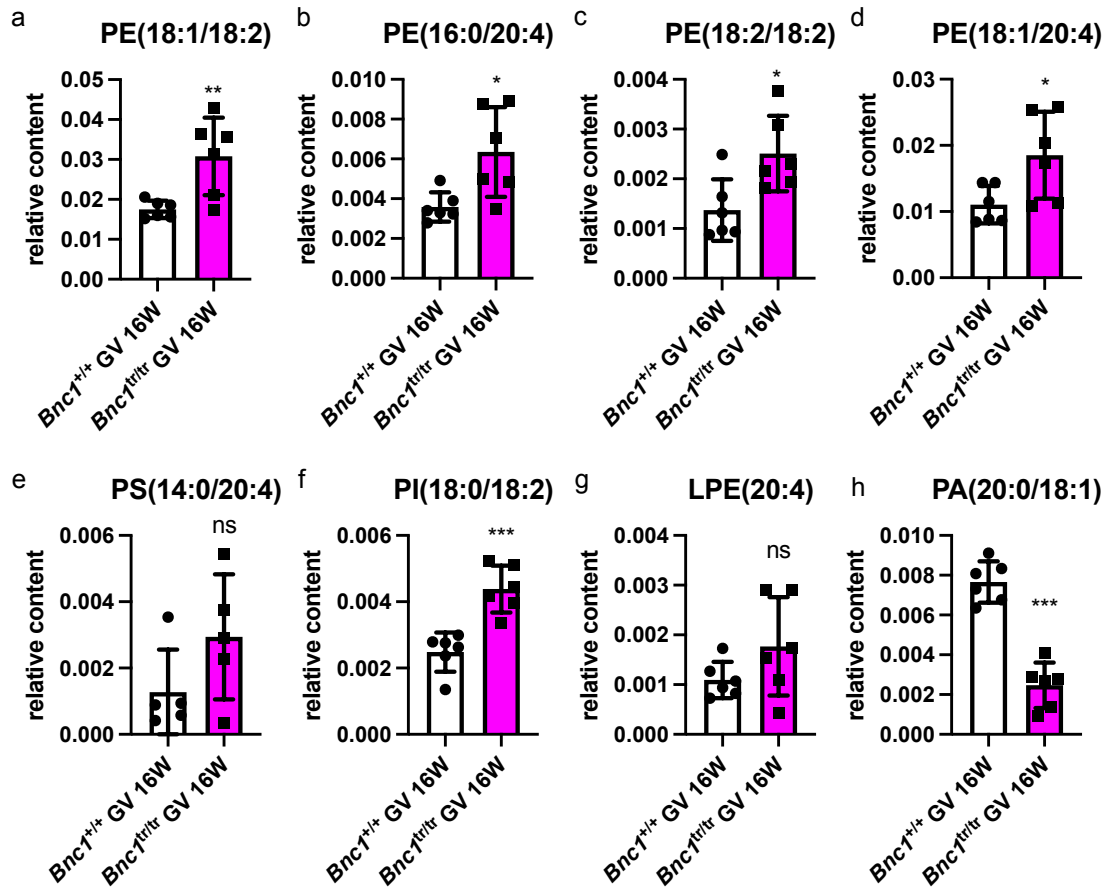

Supplementary Figure 6. Targeted lipidomics of *Bnc1*<sup>+/+</sup> and *Bnc1*<sup>tr/tr</sup> GV oocytes.

**a** Targeted lipidomics showed increased PE (18:1/18:2) (P=0.0084). **b** Targeted lipidomics showed increased PE (16:0/20:4) (P=0.0173). **c** Targeted lipidomics showed increased PE (18:2/18:2) (P=0.0176). **d** Targeted lipidomics showed increased PE (18:1/20:4) (P=0.0283). **e** Targeted lipidomics showed increased PS (14:0/20:4) (P=0.1404). **f** Targeted lipidomics showed increased PI (18:0/18:2) (P=0.0005). **g** Targeted lipidomics showed increased LPE (20:4) levels (P=0.1481). **h** Targeted lipidomics showed decreased PA (20:0/18:1) levels (P<0.0001) in *Bnc1*<sup>tr/tr</sup> mice (n=6) compared to WT mice (n=6). The error bars indicate the mean values ± SDs, unpaired t test, two-tailed. \*p value < 0.05, \*\*p value < 0.01 and \*\*\*p value < 0.001. Source data are provided as a Source Data file.

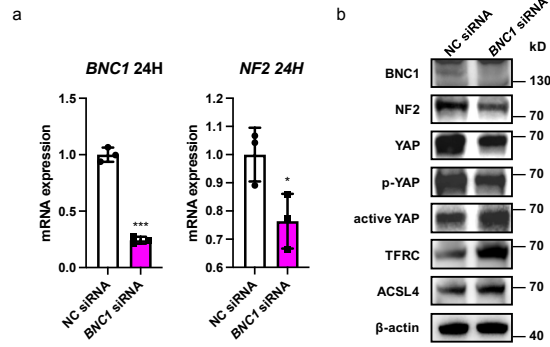

**Supplementary Figure 7. *BNC1* regulates NF2-YAP-ferroptosis axis in ES-2 cell line.**

**a** RT-PCR of *BNC1* and *NF2* after *BNC1* siRNA interference 24 hours in ES-2 cells (the error bars indicate the mean values  $\pm$  SDs, unpaired t test, two-tailed, p value < 0.0001 for *BNC1* and p value = 0.0387 for *NF2*, n = 3 with 3 independently experiments). **b** WB of BNC1, NF2, p-YAP, active YAP, YAP, TFRC and ACSL4 after *BNC1* siRNA interference 48 hours in ES-2 cells (3 independently experiments). \*p value < 0.05, \*\*p value < 0.01 and \*\*\*p value < 0.001. Source data are provided as a Source Data file.

## Supplementary Tables

**Supplement Table 1 RT-PCR Primers and siRNA targeting sequences**

| RT-PCR primers and siRNA targeting sequences |         |                         |                          |
|----------------------------------------------|---------|-------------------------|--------------------------|
| Gene                                         | Species | Forward primer (5'–3')  | Reverse primer (5'–3')   |
| <i>Bax</i>                                   | Mouse   | TTGCCCTCTTCTACTTTGCTAG  | CCATGATGGTTCTGATCAGCTC   |
| <i>Bcl2</i>                                  | Mouse   | GAACTCAAAGAAGGCCACAATC  | GATGACTTCTCTCGTCGCTAC    |
| <i>Cox2</i>                                  | Mouse   | CATGAGCCGTCCCCTCACTAGG  | TGGTCGGTTTGATGCTACTGTTGC |
| <i>Nox1</i>                                  | Mouse   | GTGCCTTTGCTGTTCAACAAC   | AGCCAGTGAGGAAGAGACGGTAG  |
| <i>Bnc1</i>                                  | Mouse   | GTCCCTCAGTCACACAGAGTATC | CTCAGTCTCCCTCTCTGAATTG   |
| <i>Nf2</i>                                   | Mouse   | GAGGAGAGAATTACTGCTTGGT  | CCCTTTTTATTCCGGATTGCAA   |
| <i>Tfrc</i>                                  | Mouse   | TCACACTCTCTCAGCTTTAGTG  | TGGTTTCTGAAGAGGGTTTCAT   |
| <i>Acs14</i>                                 | Mouse   | CAATAGAGCAGAGTACCCTGAG  | TAGAACCACTGGTGTACATGAC   |
| <i>Alox5</i>                                 | Mouse   | GGCGAGATCTACCTAGTCAAAA  | GATGTGAATTGGTCATCTCGG    |
| <i>Alox12</i>                                | Mouse   | CAAGGAGGAGGAGTTTGACTTC  | GAACTGTGATGAGGTTGCAGAA   |
| <i>Alox15</i>                                | Mouse   | GGAAGAAAGGAGGAGTCTGTAC  | GTCTTTTGTCTCTCGAAATCG    |
| <i>Aloxe3</i>                                | Mouse   | AATCATCTTTAATTGCTCCGCC  | GTAACCTTTCATTGTCGTGTCG   |
| <i>Lpcat3</i>                                | Mouse   | CATGAAAGTGTGGCTCTTTGAA  | GTTTGAAGATGTAACGGGCTAC   |
| <i>Slc3a2</i>                                | Mouse   | AGGGACTCCTGTTTTAGCTAC   | GTGAAAGATGCTGGACTCATT    |
| <i>Slc7a11</i>                               | Mouse   | CTATTTTACCACCATCAGTGCG  | ATCGGGACTGCTAATGAGAATT   |
| <i>Fth1</i>                                  | Mouse   | TAAAGAAACCAGACCGTGATGA  | ATTCACACTCTTTTCCAAGTGC   |
| <i>Gapdh</i>                                 | Mouse   | CAGGAGGCATTGCTGATGAT    | GAAGGCTGGGGCTCATT        |
| <i>Nf2(ChIP)</i>                             | Mouse   | ACCAGTCTTGCTAGAGTAGG    | AGGCCTACTCCACCAATTGA     |
| <i>BNC1</i>                                  | Human   | GTCCCTCAGTCACACAGAGTATC | CTCAGTCTCCCTCTCTGAATTG   |
| <i>NF2</i>                                   | Human   | GAGGAGAGAATTACTGCTTGGT  | CCCTTTTTATTCCGGATTGCAA   |
| <i>GAPDH</i>                                 | Human   | GGAGCGAGATCCCTCCAAAAT   | GGCTGTTGTCATACTTCTCATGG  |
| <b>siRNA</b>                                 |         | <b>Sense</b>            | <b>Antisense</b>         |
| <i>BNC1</i>                                  | Human   | GGACACUUCAGGAUUAUAUTT   | AUAUAAUCCUGAAGUGUCCTT    |
| Negative control                             | Human   | UUCUUCGAACGUGUCACGUTT   | ACGUGACACGUUCGGAGAATT    |

## Uncropped scans of all blots and gels in Supplementary Figures

Supplementary Figure 1a Ovaries from *Bnc1*<sup>+/+</sup> and *Bnc1*<sup>tr/tr</sup> mice at 3 weeks old were subjected to WB analysis.

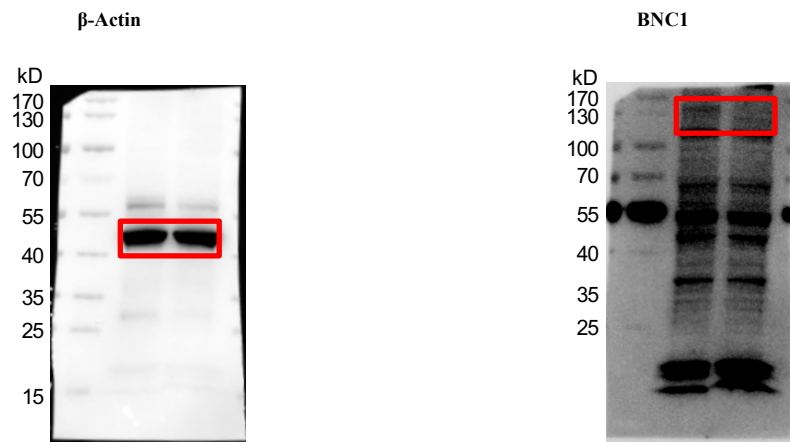



Supplementary Figure 1b Ovaries from 36-week-old *Bncl*<sup>+/+</sup> and *Bncl*<sup>tr/tr</sup> mice were subjected to WB analysis.

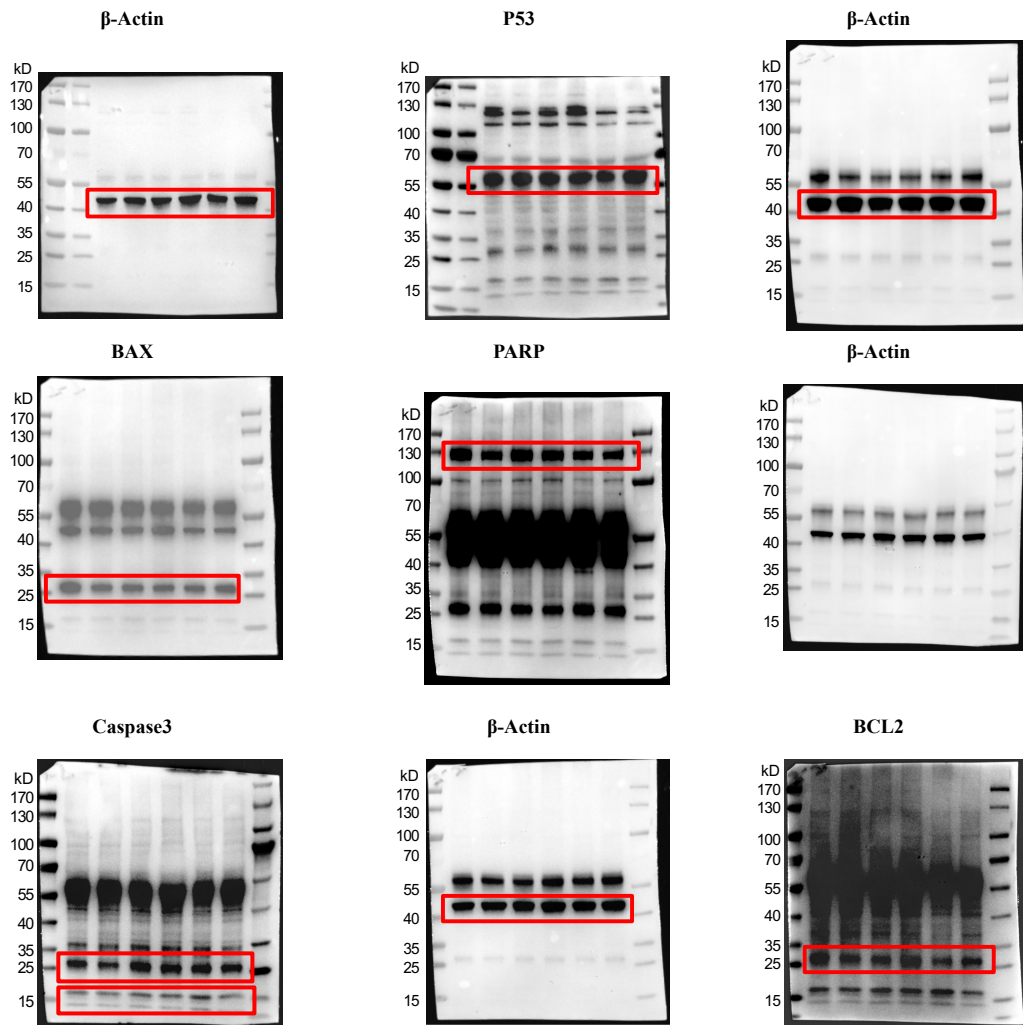

Supplementary Figure 2b WB of GPX4 in mouse ovaries of *Bnc1*<sup>+/+</sup> and *Bnc1*<sup>tr/tr</sup> mouse ovaries.

$\beta$ -Actin

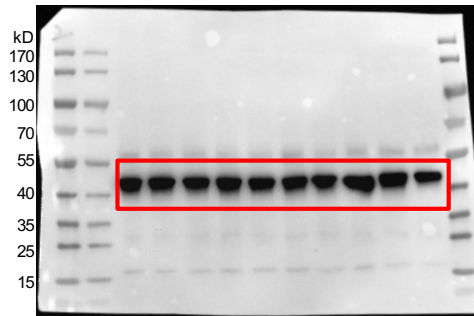

GPX4

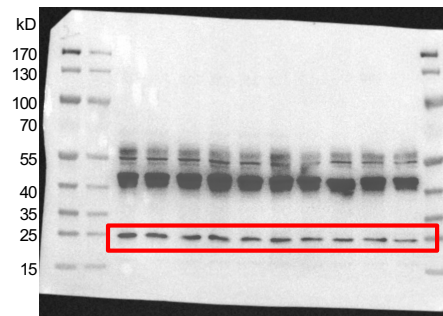

Supplementary Figure 3h WB of GPX4 in GV oocytes.

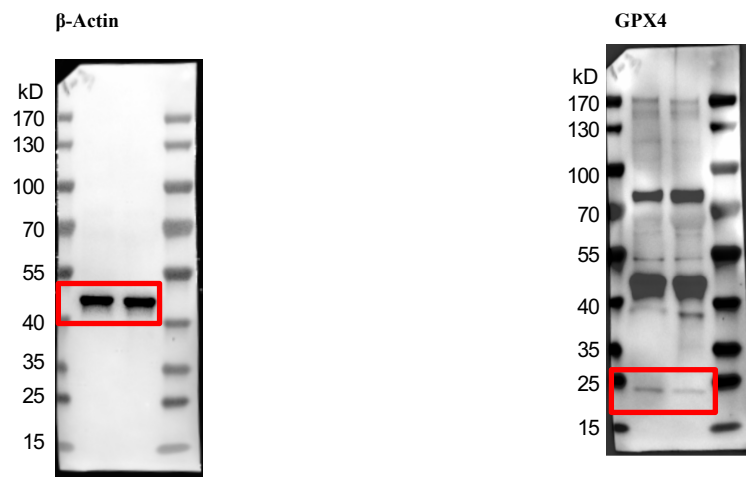

Supplementary Figure 5d WB analysis of NF2, p-YAP, active YAP, YAP, ACSL4, TFRC and  $\beta$ -actin in GV oocytes at 4 weeks old.

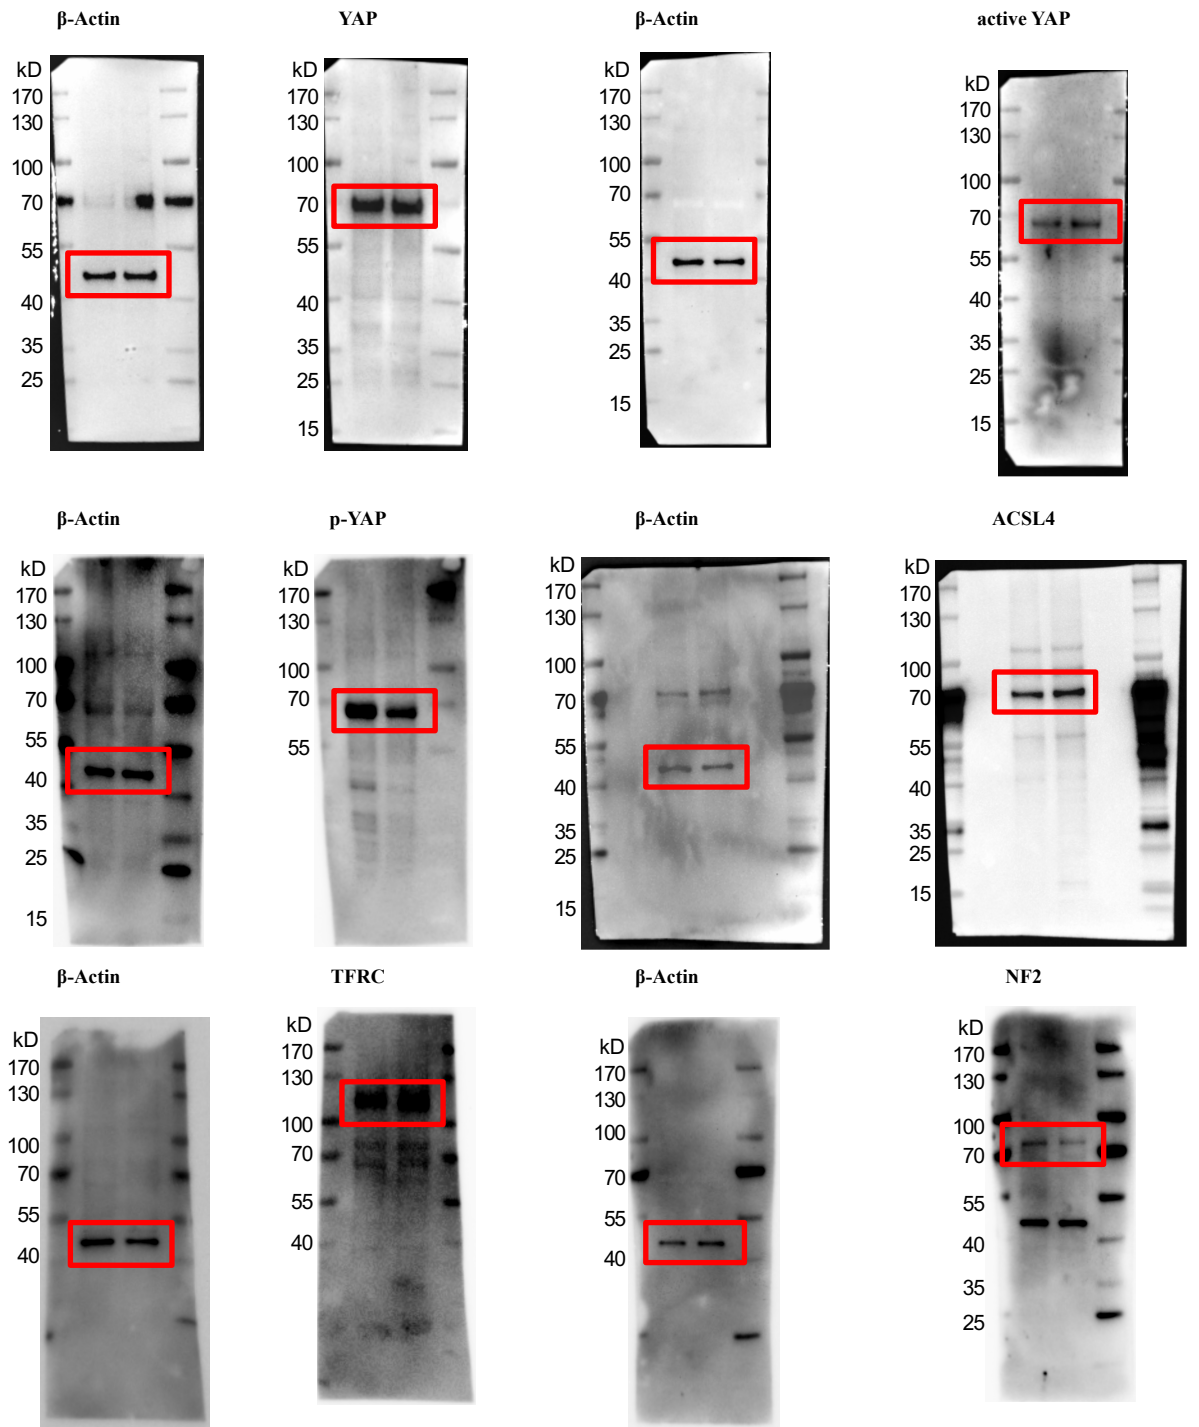

Supplementary Figure 7b WB of BNC1, NF2, p-YAP, active YAP, YAP, TFRC and ACSL4 after *BNC1* siRNA interference 48 hours in ES-2 cells.

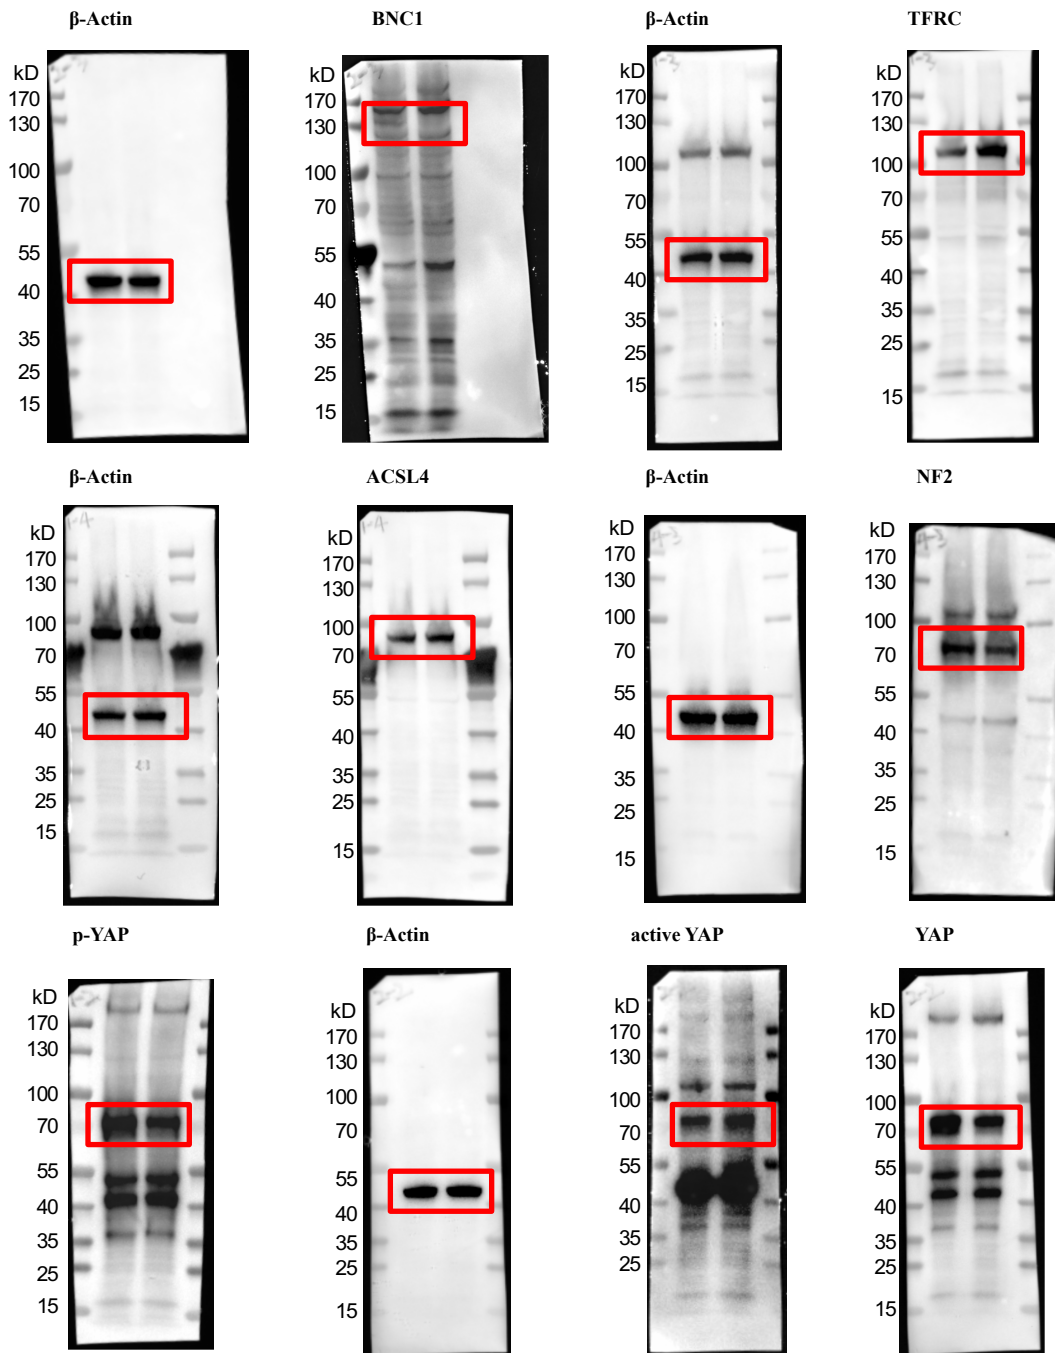

Supplement: 41467_2022_33323_MOESM1_ESM.pdf [file 41467_2022_33323_MOESM1_ESM.pdf]
